# Supplementary material for: Anion-templated hexagonal nanotubes
Source: Royal Society of Chemistry journal article supplement (doi:10.1039/c5sc02577j), 2015-01-01

# **Anion-templated hexagonal nanotubes**

Nicholas G. White and Mark J. MacLachlan\*

Department of Chemistry, University of British Columbia, 2036 Main Mall, Vancouver,  
British Columbia, Canada, V6T 1Z1

Email: [mmaclach@chem.ubc.ca](mailto:mmaclach@chem.ubc.ca)

## **Annotated CIFcheck**

For a description of single crystal X-ray crystallography and detailed  
description of each structure, see the main Supporting Information  
document

# checkCIF/PLATON report

You have not supplied any structure factors. As a result the full set of tests cannot be run.

THIS REPORT IS FOR GUIDANCE ONLY. IF USED AS PART OF A REVIEW PROCEDURE FOR PUBLICATION, IT SHOULD NOT REPLACE THE EXPERTISE OF AN EXPERIENCED CRYSTALLOGRAPHIC REFEREE.

No syntax errors found.      CIF dictionary      Interpreting this report

Datablock: 1\_fullsqueeze

Nanotubes prepared from **1**, where PLATON-SQUEEZE was used to include electron density from TBA cations (see main Supporting Information document for more information)

Bond precision:    C-C = 0.0104 Å                      Wavelength=0.71073

Cell:                      a=40.346(14)                      b=40.346(14)                      c=17.984(6)

                                    alpha=90                      beta=90                      gamma=120

Temperature:            90 K

|                | Calculated        | Reported             |
|----------------|-------------------|----------------------|
| Volume         | 25352(23)         | 25352(15)            |
| Space group    | P 3 c 1           | P 3 c 1              |
| Hall group     | P 3 -2" c         | P 3 -2" c            |
| Moiety formula | C22 H18 O4, 2(Br) | 3(C22 H18 O4), 6(Br) |
| Sum formula    | C22 H18 Br2 O4    | C66 H54 Br6 O12      |
| Mr             | 506.16            | 1518.57              |
| Dx,g cm-3      | 0.597             | 0.597                |
| Z              | 18                | 6                    |
| Mu (mm-1)      | 1.448             | 1.448                |
| F000           | 4536.0            | 4536.0               |
| F000'          | 4527.89           |                      |
| h,k,lmax       | 50,50,22          | 43,50,22             |
| Nref           | 34441[ 17233]     | 34142                |
| Tmin,Tmax      | 0.600,0.667       | 0.623,1.000          |
| Tmin'          | 0.381             |                      |

Correction method= # Reported T Limits: Tmin=0.623 Tmax=1.000

AbsCorr = MULTI-SCAN

Data completeness= 1.98/0.99                      Theta(max)= 26.331

R(reflections)= 0.1187( 25363)                      wR2(reflections)= 0.2640( 26467)

S = 0.944                                      Npar= 758

The following ALERTS were generated. Each ALERT has the format

**test-name\_ALERT\_alert-type\_alert-level.**

Click on the hyperlinks for more details of the test.

**Alert level B**  
PLAT213\_ALERT\_2\_B Atom O108 has ADP max/min Ratio ..... 4.4 prolat

**Alert level C**  
DIFMN02\_ALERT\_2\_C The minimum difference density is < -0.1\*ZMAX\*0.75  
\_refine\_diff\_density\_min given = -3.170  
Test value = -2.625  
DIFMN03\_ALERT\_1\_C The minimum difference density is < -0.1\*ZMAX\*0.75  
The relevant atom site should be identified.  
DIFMX01\_ALERT\_2\_C The maximum difference density is > 0.1\*ZMAX\*0.75  
\_refine\_diff\_density\_max given = 3.130  
Test value = 2.625  
DIFMX02\_ALERT\_1\_C The maximum difference density is > 0.1\*ZMAX\*0.75  
The relevant atom site should be identified.  
RFACG01\_ALERT\_3\_C The value of the R factor is > 0.10  
R factor given 0.119  
RFACR01\_ALERT\_3\_C The value of the weighted R factor is > 0.25  
Weighted R factor given 0.264  
PLAT082\_ALERT\_2\_C High R1 Value ..... 0.12 Report  
PLAT084\_ALERT\_3\_C High wR2 Value (i.e. > 0.25) ..... 0.26 Report  
PLAT097\_ALERT\_2\_C Large Reported Max. (Positive) Residual Density 3.13 eA-3  
PLAT098\_ALERT\_2\_C Large Reported Min. (Negative) Residual Density -3.17 eA-3  
PLAT341\_ALERT\_3\_C Low Bond Precision on C-C Bonds ..... 0.0104 Ang.

Residual electron density  
is located close to the  
bromide anions

**Alert level G**  
PLAT002\_ALERT\_2\_G Number of Distance or Angle Restraints on AtSite 78 Note  
PLAT003\_ALERT\_2\_G Number of Uiso or Uij Restrained non-H Atoms ... 78 Report  
PLAT005\_ALERT\_5\_G No iucr\_refine\_instructions\_details in the CIF Please Do !  
PLAT007\_ALERT\_5\_G Number of Unrefined Donor-H Atoms ..... 12 Report  
PLAT042\_ALERT\_1\_G Calc. and Reported MoietyFormula Strings Differ Please Check  
PLAT045\_ALERT\_1\_G Calculated and Reported Z Differ by ..... 3.00 Ratio  
PLAT063\_ALERT\_4\_G Crystal Size Likely too Large for Beam Size .... 0.66 mm  
PLAT112\_ALERT\_2\_G ADDSYM Detects Additional (Pseudo) Symm. Elem... sub Check  
PLAT152\_ALERT\_1\_G The Supplied and Calc. Volume s.u. Differ by ... 8 Units  
PLAT606\_ALERT\_4\_G VERY LARGE Solvent Accessible VOID(S) in Structure ! Info  
PLAT720\_ALERT\_4\_G Number of Unusual/Non-Standard Labels ..... 18 Note  
PLAT808\_ALERT\_5\_G No Parseable SHELXL Style Weighting Scheme Found Please Check  
PLAT860\_ALERT\_3\_G Number of Least-Squares Restraints ..... 1969 Note  
PLAT869\_ALERT\_4\_G ALERTS Related to the use of SQUEEZE Suppressed ! Info

No additional symmetry  
could be found using  
PLATON ADDSYM or  
SUPERFLIP

0 **ALERT level A** = Most likely a serious problem - resolve or explain  
1 **ALERT level B** = A potentially serious problem, consider carefully  
11 **ALERT level C** = Check. Ensure it is not caused by an omission or oversight  
14 **ALERT level G** = General information/check it is not something unexpected

5 ALERT type 1 CIF construction/syntax error, inconsistent or missing data  
9 ALERT type 2 Indicator that the structure model may be wrong or deficient  
5 ALERT type 3 Indicator that the structure quality may be low  
4 ALERT type 4 Improvement, methodology, query or suggestion  
3 ALERT type 5 Informative message, check

Nanotubes prepared from  
1, where TBA cations have  
been modeled  
(see main Supporting  
Information document for  
more information)

## Datablock: 1\_partialsqueeze

Bond precision: C-C = 0.0173 A

Wavelength=0.71073

Cell: a=40.346(14) b=40.346(14) c=17.984(6)  
alpha=90 beta=90 gamma=120  
Temperature: 90 K

|                | Calculated                      | Reported                           |
|----------------|---------------------------------|------------------------------------|
| Volume         | 25352(23)                       | 25352(15)                          |
| Space group    | P 3 c 1                         | P 3 c 1                            |
| Hall group     | P 3 -2" c                       | P 3 -2" c                          |
| Moiety formula | C22 H18 O4, 2(C16 H36 N), 2(Br) | 3(C22 H18 O4), 6(C16 H36 N), 6(Br) |
| Sum formula    | C54 H90 Br2 N2 O4               | C162 H270 Br6 N6 O12               |
| Mr             | 991.08                          | 2973.36                            |
| Dx,g cm-3      | 1.168                           | 1.168                              |
| Z              | 18                              | 6                                  |
| Mu (mm-1)      | 1.480                           | 1.480                              |
| F000           | 9540.0                          | 9540.0                             |
| F000'          | 9532.84                         |                                    |
| h,k,lmax       | 50,50,22                        | 43,50,22                           |
| Nref           | 34441[ 17233]                   | 34142                              |
| Tmin,Tmax      | 0.593,0.661                     | 0.623,1.000                        |
| Tmin'          | 0.373                           |                                    |

Correction method= # Reported T Limits: Tmin=0.623 Tmax=1.000  
AbsCorr = MULTI-SCAN

Data completeness= 1.98/0.99      Theta(max)= 26.331  
R(reflections)= 0.1799( 29002)      wR2(reflections)= 0.3446( 30931)  
S = 0.987      Npar= 746

Due to the poor quality of the data, it was not possible to achieve a chemically-sensible anisotropic refinement of the data including modeling the TBA cations

The following ALERTS were generated. Each ALERT has the format  
**test-name\_ALERT\_alert-type\_alert-level.**  
Click on the hyperlinks for more details of the test.

 **Alert level A**  
PLAT201\_ALERT\_2\_A Isotropic non-H Atoms in Main Residue(s) ..... 180 Report

 **Alert level B**  
DIFMN02\_ALERT\_2\_B The minimum difference density is < -0.1\*ZMAX\*1.00  
    \_refine\_diff\_density\_min given = -4.150  
    Test value = -3.500  
DIFMX01\_ALERT\_2\_B The maximum difference density is > 0.1\*ZMAX\*1.00  
    \_refine\_diff\_density\_max given = 6.630  
    Test value = 3.500  
RFACG01\_ALERT\_3\_B The value of the R factor is > 0.15  
    R factor given 0.180  
PLAT082\_ALERT\_2\_B High R1 Value ..... 0.18 Report  
PLAT097\_ALERT\_2\_B Large Reported Max. (Positive) Residual Density 6.63 eA-3  
PLAT098\_ALERT\_2\_B Large Reported Min. (Negative) Residual Density -4.15 eA-3

Residual electron density is located close to the bromide anions

PLAT341\_ALERT\_3\_B Low Bond Precision on C-C Bonds ..... 0.0173 Ang.

Alert level C

DIFMN03\_ALERT\_1\_C The minimum difference density is < -0.1\*ZMAX\*0.75  
The relevant atom site should be identified.  
DIFMX02\_ALERT\_1\_C The maximum difference density is > 0.1\*ZMAX\*0.75  
The relevant atom site should be identified.  
RFACR01\_ALERT\_3\_C The value of the weighted R factor is > 0.25  
Weighted R factor given 0.345  
PLAT084\_ALERT\_3\_C High wr2 Value (i.e. > 0.25) ..... 0.34 Report  
PLAT202\_ALERT\_3\_C Isotropic non-H Atoms in Anion/Solvent ..... 6  
PLAT758\_ALERT\_4\_C D-H..A Calc 130.00, Rep 130.3(4) ..... Senseless su  
C601 -H6012-O207 1.555 1.555 1.555 # 858  
PLAT758\_ALERT\_4\_C D-H..A Calc 135.00, Rep 135.1(4) ..... Senseless su  
C401 -H4011-O1 1.555 1.555 1.555 # 858  
PLAT758\_ALERT\_4\_C D-H..A Calc 146.00, Rep 145.7(4) ..... Senseless su  
C312 -H3122-O2 1.555 1.555 1.555 # 858

Alert level G

PLAT002\_ALERT\_2\_G Number of Distance or Angle Restraints on AtSite 180 Note  
PLAT003\_ALERT\_2\_G Number of Uiso or Uij Restrained non-H Atoms ... 180 Report  
PLAT005\_ALERT\_5\_G No iucr\_refine\_instructions\_details in the CIF Please Do !  
PLAT007\_ALERT\_5\_G Number of Unrefined Donor-H Atoms ..... 12 Report  
PLAT042\_ALERT\_1\_G Calc. and Reported MoietyFormula Strings Differ Please Check  
PLAT045\_ALERT\_1\_G Calculated and Reported Z Differ by ..... 3.00 Ratio  
PLAT063\_ALERT\_4\_G Crystal Size Likely too Large for Beam Size .... 0.66 mm  
PLAT152\_ALERT\_1\_G The Supplied and Calc. Volume s.u. Differ by ... 8 Units  
PLAT606\_ALERT\_4\_G VERY LARGE Solvent Accessible VOID(S) in Structure ! Info  
PLAT720\_ALERT\_4\_G Number of Unusual/Non-Standard Labels ..... 252 Note  
PLAT808\_ALERT\_5\_G No Parseable SHELXL Style Weighting Scheme Found Please Check  
PLAT860\_ALERT\_3\_G Number of Least-Squares Restraints ..... 709 Note  
PLAT869\_ALERT\_4\_G ALERTS Related to the use of SQUEEZE Suppressed ! Info

- 1 ALERT level A = Most likely a serious problem - resolve or explain  
7 ALERT level B = A potentially serious problem, consider carefully  
8 ALERT level C = Check. Ensure it is not caused by an omission or oversight  
13 ALERT level G = General information/check it is not something unexpected
- 5 ALERT type 1 CIF construction/syntax error, inconsistent or missing data  
8 ALERT type 2 Indicator that the structure model may be wrong or deficient  
6 ALERT type 3 Indicator that the structure quality may be low  
7 ALERT type 4 Improvement, methodology, query or suggestion  
3 ALERT type 5 Informative message, check

Datablock: oxidized\_nanotubes\_prepared\_from\_2

Bond precision: C-C = 0.0054 A Wavelength=0.71073

Cell: a=39.973(4) b=39.973(4) c=18.0631(18)  
alpha=90 beta=90 gamma=120

Temperature: 90 K

Nanotubes prepared from 2, where oxidation of 2 occurred during crystal growth

|                | Calculated                      | Reported                        |
|----------------|---------------------------------|---------------------------------|
| Volume         | 24995(6)                        | 24995(4)                        |
| Space group    | R 3 c                           | R 3 c                           |
| Hall group     | R 3 -2" c                       | R 3 -2" c                       |
| Moiety formula | C22 H16 O6, 2(C16 H36 N), 2(Br) | C22 H16 O6, 2(C16 H36 N), 2(Br) |
| Sum formula    | C54 H88 Br2 N2 O6               | C54 H88 Br2 N2 O6               |
| Mr             | 1021.06                         | 1021.11                         |
| Dx,g cm-3      | 1.221                           | 1.221                           |
| Z              | 18                              | 18                              |
| Mu (mm-1)      | 1.506                           | 1.506                           |
| F000           | 9792.0                          | 9792.0                          |
| F000'          | 9785.19                         |                                 |
| h,k,lmax       | 51,51,23                        | 44,51,23                        |
| Nref           | 12771[ 6398]                    | 12725                           |
| Tmin,Tmax      | 0.655,0.697                     | 0.705,1.000                     |
| Tmin'          | 0.325                           |                                 |

Correction method= # Reported T Limits: Tmin=0.705 Tmax=1.000  
AbsCorr = MULTI-SCAN

Data completeness= 1.99/1.00            Theta(max)= 27.510  
  
R(reflections)= 0.0506( 11974)        wR2(reflections)= 0.1030( 12647)  
  
S = 0.914                                Npar= 731

The following ALERTS were generated. Each ALERT has the format  
**test-name\_ALERT\_alert-type\_alert-level.**  
Click on the hyperlinks for more details of the test.

|                                                                            |            |
|----------------------------------------------------------------------------|------------|
| <b>Alert level C</b>                                                       |            |
| PLAT090_ALERT_3_C Poor Data / Parameter Ratio (Zmax > 18) .....            | 8.75 Note  |
| PLAT213_ALERT_2_C Atom C134                    has ADP max/min Ratio ..... | 3.3 oblate |
| PLAT213_ALERT_2_C Atom C233                    has ADP max/min Ratio ..... | 3.8 oblate |
| PLAT213_ALERT_2_C Atom C234                    has ADP max/min Ratio ..... | 3.2 oblate |
| PLAT222_ALERT_3_C Large Non-Solvent H        Uiso(max)/Uiso(min) ...       | 4.3 Ratio  |
| PLAT250_ALERT_2_C Large U3/U1 Ratio for Average U(i,j) Tensor ....         | 2.1 Note   |
| PLAT250_ALERT_2_C Large U3/U1 Ratio for Average U(i,j) Tensor ....         | 2.1 Note   |
| PLAT250_ALERT_2_C Large U3/U1 Ratio for Average U(i,j) Tensor ....         | 2.3 Note   |
| PLAT413_ALERT_2_C Short Inter XH3 .. XHn        H742 .. H2331 ..           | 2.05 Ang.  |

|                                                                     |             |
|---------------------------------------------------------------------|-------------|
| <b>Alert level G</b>                                                |             |
| PLAT003_ALERT_2_G Number of Uiso or Uij Restrained non-H Atoms ...  | 51 Report   |
| PLAT005_ALERT_5_G No _iucr_refine_instructions_details in the CIF   | Please Do ! |
| PLAT007_ALERT_5_G Number of Unrefined Donor-H Atoms .....           | 4 Report    |
| PLAT063_ALERT_4_G Crystal Size Likely too Large for Beam Size ....  | 0.74 mm     |
| PLAT152_ALERT_1_G The Supplied and Calc. Volume s.u. Differ by ...  | 2 Units     |
| PLAT300_ALERT_4_G Atom Site Occupancy of >N100    is Constrained at | 0.650 Check |
| PLAT300_ALERT_4_G Atom Site Occupancy of >C101    is Constrained at | 0.650 Check |
| PLAT300_ALERT_4_G Atom Site Occupancy of >C102    is Constrained at | 0.650 Check |

Major position of  
disordered TBA cation



|                   |                                                  |                   |       |              |
|-------------------|--------------------------------------------------|-------------------|-------|--------------|
| PLAT300_ALERT_4_G | Atom Site Occupancy of <C224                     | is Constrained at | 0.350 | Check        |
| PLAT300_ALERT_4_G | Atom Site Occupancy of <C231                     | is Constrained at | 0.350 | Check        |
| PLAT300_ALERT_4_G | Atom Site Occupancy of <C232                     | is Constrained at | 0.350 | Check        |
| PLAT300_ALERT_4_G | Atom Site Occupancy of <C233                     | is Constrained at | 0.350 | Check        |
| PLAT300_ALERT_4_G | Atom Site Occupancy of <C234                     | is Constrained at | 0.350 | Check        |
| PLAT300_ALERT_4_G | Atom Site Occupancy of <H2021                    | is Constrained at | 0.350 | Check        |
| PLAT300_ALERT_4_G | Atom Site Occupancy of <H2022                    | is Constrained at | 0.350 | Check        |
| PLAT300_ALERT_4_G | Atom Site Occupancy of <H2031                    | is Constrained at | 0.350 | Check        |
| PLAT300_ALERT_4_G | Atom Site Occupancy of <H2032                    | is Constrained at | 0.350 | Check        |
| PLAT300_ALERT_4_G | Atom Site Occupancy of <H2041                    | is Constrained at | 0.350 | Check        |
| PLAT300_ALERT_4_G | Atom Site Occupancy of <H2043                    | is Constrained at | 0.350 | Check        |
| PLAT300_ALERT_4_G | Atom Site Occupancy of <H2042                    | is Constrained at | 0.350 | Check        |
| PLAT300_ALERT_4_G | Atom Site Occupancy of <H2012                    | is Constrained at | 0.350 | Check        |
| PLAT300_ALERT_4_G | Atom Site Occupancy of <H2011                    | is Constrained at | 0.350 | Check        |
| PLAT300_ALERT_4_G | Atom Site Occupancy of <H2112                    | is Constrained at | 0.350 | Check        |
| PLAT300_ALERT_4_G | Atom Site Occupancy of <H2111                    | is Constrained at | 0.350 | Check        |
| PLAT300_ALERT_4_G | Atom Site Occupancy of <H2121                    | is Constrained at | 0.350 | Check        |
| PLAT300_ALERT_4_G | Atom Site Occupancy of <H2122                    | is Constrained at | 0.350 | Check        |
| PLAT300_ALERT_4_G | Atom Site Occupancy of <H2131                    | is Constrained at | 0.350 | Check        |
| PLAT300_ALERT_4_G | Atom Site Occupancy of <H2132                    | is Constrained at | 0.350 | Check        |
| PLAT300_ALERT_4_G | Atom Site Occupancy of <H2141                    | is Constrained at | 0.350 | Check        |
| PLAT300_ALERT_4_G | Atom Site Occupancy of <H2143                    | is Constrained at | 0.350 | Check        |
| PLAT300_ALERT_4_G | Atom Site Occupancy of <H2142                    | is Constrained at | 0.350 | Check        |
| PLAT300_ALERT_4_G | Atom Site Occupancy of <H2211                    | is Constrained at | 0.350 | Check        |
| PLAT300_ALERT_4_G | Atom Site Occupancy of <H2212                    | is Constrained at | 0.350 | Check        |
| PLAT300_ALERT_4_G | Atom Site Occupancy of <H2221                    | is Constrained at | 0.350 | Check        |
| PLAT300_ALERT_4_G | Atom Site Occupancy of <H2222                    | is Constrained at | 0.350 | Check        |
| PLAT300_ALERT_4_G | Atom Site Occupancy of <H2232                    | is Constrained at | 0.350 | Check        |
| PLAT300_ALERT_4_G | Atom Site Occupancy of <H2231                    | is Constrained at | 0.350 | Check        |
| PLAT300_ALERT_4_G | Atom Site Occupancy of <H2242                    | is Constrained at | 0.350 | Check        |
| PLAT300_ALERT_4_G | Atom Site Occupancy of <H2241                    | is Constrained at | 0.350 | Check        |
| PLAT300_ALERT_4_G | Atom Site Occupancy of <H2243                    | is Constrained at | 0.350 | Check        |
| PLAT300_ALERT_4_G | Atom Site Occupancy of <H2312                    | is Constrained at | 0.350 | Check        |
| PLAT300_ALERT_4_G | Atom Site Occupancy of <H2311                    | is Constrained at | 0.350 | Check        |
| PLAT300_ALERT_4_G | Atom Site Occupancy of <H2322                    | is Constrained at | 0.350 | Check        |
| PLAT300_ALERT_4_G | Atom Site Occupancy of <H2321                    | is Constrained at | 0.350 | Check        |
| PLAT300_ALERT_4_G | Atom Site Occupancy of <H2332                    | is Constrained at | 0.350 | Check        |
| PLAT300_ALERT_4_G | Atom Site Occupancy of <H2331                    | is Constrained at | 0.350 | Check        |
| PLAT300_ALERT_4_G | Atom Site Occupancy of <H2341                    | is Constrained at | 0.350 | Check        |
| PLAT300_ALERT_4_G | Atom Site Occupancy of <H2343                    | is Constrained at | 0.350 | Check        |
| PLAT300_ALERT_4_G | Atom Site Occupancy of <H2342                    | is Constrained at | 0.350 | Check        |
| PLAT301_ALERT_3_G | Main Residue Disorder .....                      | Percentage =      | 27    | Note         |
| PLAT304_ALERT_4_G | Non-Integer Number of Atoms ( 34.45) in Resd. #  |                   | 3     | Check        |
| PLAT304_ALERT_4_G | Non-Integer Number of Atoms ( 18.55) in Resd. #  |                   | 4     | Check        |
| PLAT333_ALERT_2_G | Check Large Av C6-Ring C-C Dist. C13 -C18        |                   | 1.44  | Ang.         |
| PLAT335_ALERT_2_G | Check Large C6 Ring C-C Range C13 -C18           |                   | 0.17  | Ang.         |
| PLAT605_ALERT_4_G | Structure Contains Solvent Accessible VOIDS of . |                   | 385   | A**3         |
| PLAT720_ALERT_4_G | Number of Unusual/Non-Standard Labels .....      |                   | 72    | Note         |
| PLAT808_ALERT_5_G | No Parseable SHELXL Style Weighting Scheme Found |                   |       | Please Check |
| PLAT811_ALERT_5_G | No ADDSYM Analysis: Too Many Excluded Atoms .... |                   | !     | Info         |
| PLAT860_ALERT_3_G | Number of Least-Squares Restraints .....         |                   | 391   | Note         |
| PLAT869_ALERT_4_G | ALERTS Related to the use of SQUEEZE Suppressed  |                   | !     | Info         |

Minor position of  
disordered TBA cation

Due to 0.65/0.35  
occupancies of TBA cation  
disorder (these values sum  
to 53 atoms, for C<sub>16</sub>H<sub>36</sub>N)

---

0 **ALERT level A** = Most likely a serious problem - resolve or explain  
0 **ALERT level B** = A potentially serious problem, consider carefully  
9 **ALERT level C** = Check. Ensure it is not caused by an omission or oversight  
122 **ALERT level G** = General information/check it is not something unexpected

1 **ALERT type 1** CIF construction/syntax error, inconsistent or missing data

These alerts are caused by  
the quinone ring (which  
has a large average C-C  
bond length, and a wide  
range of bond lengths due  
to both single and double  
bonds)



10 ALERT type 2 Indicator that the structure model may be wrong or deficient  
4 ALERT type 3 Indicator that the structure quality may be low  
112 ALERT type 4 Improvement, methodology, query or suggestion  
4 ALERT type 5 Informative message, check

Datablock: oxidized\_nanotubes\_prepared\_from\_3

Nanotubes prepared from 3

|                 |                                 |                                 |               |
|-----------------|---------------------------------|---------------------------------|---------------|
| Bond precision: | C-C = 0.0108 A                  | Wavelength=0.71073              |               |
| Cell:           | a=39.896(4)                     | b=39.896(4)                     | c=18.0796(17) |
|                 | alpha=90                        | beta=90                         | gamma=120     |
| Temperature:    | 90 K                            |                                 |               |
|                 | Calculated                      | Reported                        |               |
| Volume          | 24922(6)                        | 24921(4)                        |               |
| Space group     | R 3 c                           | R 3 c                           |               |
| Hall group      | R 3 -2"c                        | R 3 -2"c                        |               |
| Moiety formula  | C22 H16 O6, 2(C16 H36 N), 2(Br) | C22 H16 O6, 2(Br), 2(C16 H36 N) |               |
| Sum formula     | C54 H88 Br2 N2 O6               | C54 H88 Br2 N2 O6               |               |
| Mr              | 1021.06                         | 1021.11                         |               |
| Dx,g cm-3       | 1.225                           | 1.225                           |               |
| Z               | 18                              | 18                              |               |
| Mu (mm-1)       | 1.510                           | 1.510                           |               |
| F000            | 9792.0                          | 9791.9                          |               |
| F000'           | 9785.19                         |                                 |               |
| h,k,lmax        | 49,49,22                        | 42,49,22                        |               |
| Nref            | 11356[ 5690]                    | 10976                           |               |
| Tmin,Tmax       | 0.865,0.956                     | 0.889,1.000                     |               |
| Tmin'           | 0.547                           |                                 |               |

Correction method= # Reported T Limits: Tmin=0.889 Tmax=1.000  
AbsCorr = MULTI-SCAN

Data completeness= 1.93/0.97            Theta(max)= 26.388

R(reflections)= 0.0573( 6687)            wR2(reflections)= 0.1415( 8235)

S = 0.951                                  Npar= 578

The following ALERTS were generated. Each ALERT has the format  
**test-name\_ALERT\_alert-type\_alert-level.**  
Click on the hyperlinks for more details of the test.

 **Alert level B**  
PLAT250\_ALERT\_2\_B Large U3/U1 Ratio for Average U(i,j) Tensor .... 4.9 Note

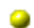

### Alert level C

|                   |                                               |           |        |
|-------------------|-----------------------------------------------|-----------|--------|
| PLAT090_ALERT_3_C | Poor Data / Parameter Ratio (Zmax > 18) ..... | 9.84      | Note   |
| PLAT213_ALERT_2_C | Atom N150 has ADP max/min Ratio .....         | 3.4       | prolat |
| PLAT213_ALERT_2_C | Atom C161 has ADP max/min Ratio .....         | 3.5       | prolat |
| PLAT213_ALERT_2_C | Atom C181 has ADP max/min Ratio .....         | 3.1       | prolat |
| PLAT220_ALERT_2_C | Large Non-Solvent C Ueq(max)/Ueq(min) Range   | 3.4       | Ratio  |
| PLAT222_ALERT_3_C | Large Non-Solvent H Uiso(max)/Uiso(min) ...   | 4.1       | Ratio  |
| PLAT241_ALERT_2_C | High Ueq as Compared to Neighbors for .....   | C133      | Check  |
| PLAT241_ALERT_2_C | High Ueq as Compared to Neighbors for .....   | C153      | Check  |
| PLAT241_ALERT_2_C | High Ueq as Compared to Neighbors for .....   | C172      | Check  |
| PLAT242_ALERT_2_C | Low Ueq as Compared to Neighbors for .....    | C132      | Check  |
| PLAT242_ALERT_2_C | Low Ueq as Compared to Neighbors for .....    | C152      | Check  |
| PLAT242_ALERT_2_C | Low Ueq as Compared to Neighbors for .....    | C173      | Check  |
| PLAT341_ALERT_3_C | Low Bond Precision on C-C Bonds .....         | 0.0108    | Ang.   |
| PLAT758_ALERT_4_C | D-H..A Calc 133.00, Rep 133.4(2) .....        | Senseless | su     |
|                   | C101 -H1012-O8 1.555 1.555 1.555 #            | 286       |        |

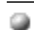

### Alert level G

|                   |                                                  |        |        |
|-------------------|--------------------------------------------------|--------|--------|
| PLAT002_ALERT_2_G | Number of Distance or Angle Restraints on AtSite | 34     | Note   |
| PLAT003_ALERT_2_G | Number of Uiso or Uij Restrained non-H Atoms ... | 34     | Report |
| PLAT005_ALERT_5_G | No _iucr_refine_instructions_details in the CIF  | Please | Do !   |
| PLAT007_ALERT_5_G | Number of Unrefined Donor-H Atoms .....          | 4      | Report |
| PLAT042_ALERT_1_G | Calc. and Reported MoietyFormula Strings Differ  | Please | Check  |
| PLAT152_ALERT_1_G | The Supplied and Calc. Volume s.u. Differ by ... | 2      | Units  |
| PLAT333_ALERT_2_G | Check Large Av C6-Ring C-C Dist. C13 -C18        | 1.43   | Ang.   |
| PLAT335_ALERT_2_G | Check Large C6 Ring C-C Range C13 -C18           | 0.18   | Ang.   |
| PLAT605_ALERT_4_G | Structure Contains Solvent Accessible VOIDS of . | 429    | A**3   |
| PLAT720_ALERT_4_G | Number of Unusual/Non-Standard Labels .....      | 72     | Note   |
| PLAT808_ALERT_5_G | No Parseable SHELXL Style Weighting Scheme Found | Please | Check  |
| PLAT860_ALERT_3_G | Number of Least-Squares Restraints .....         | 293    | Note   |
| PLAT869_ALERT_4_G | ALERTS Related to the use of SQUEEZE Suppressed  | !      | Info   |

0 **ALERT level A** = Most likely a serious problem - resolve or explain

1 **ALERT level B** = A potentially serious problem, consider carefully

14 **ALERT level C** = Check. Ensure it is not caused by an omission or oversight

13 **ALERT level G** = General information/check it is not something unexpected

2 **ALERT type 1** CIF construction/syntax error, inconsistent or missing data

15 **ALERT type 2** Indicator that the structure model may be wrong or deficient

4 **ALERT type 3** Indicator that the structure quality may be low

4 **ALERT type 4** Improvement, methodology, query or suggestion

3 **ALERT type 5** Informative message, check

These alerts are caused by the quinone ring (which has a large average C-C bond length, and a wide range of bond lengths due to both single and double bonds)

It is advisable to attempt to resolve as many as possible of the alerts in all categories. Often the minor alerts point to easily fixed oversights, errors and omissions in your CIF or refinement strategy, so attention to these fine details can be worthwhile. In order to resolve some of the more serious problems it may be necessary to carry out additional measurements or structure refinements. However, the purpose of your study may justify the reported deviations and the more serious of these should normally be commented upon in the discussion or experimental section of a paper or in the "special\_details" fields of the CIF. checkCIF was carefully designed to identify outliers and unusual parameters, but every test has its limitations and alerts that are not important in a particular case may appear. Conversely, the absence of alerts does not guarantee there are no aspects of the results needing attention. It is up to the individual to critically assess their own results and, if necessary, seek expert advice.

### **Publication of your CIF in IUCr journals**

A basic structural check has been run on your CIF. These basic checks will be run on all CIFs submitted for publication in IUCr journals (*Acta Crystallographica*, *Journal of Applied Crystallography*, *Journal of Synchrotron Radiation*); however, if you intend to submit to *Acta Crystallographica Section C* or *E*, you should make sure that full publication checks are run on the final version of your CIF prior to submission.

### **Publication of your CIF in other journals**

Please refer to the *Notes for Authors* of the relevant journal for any special instructions relating to CIF submission.

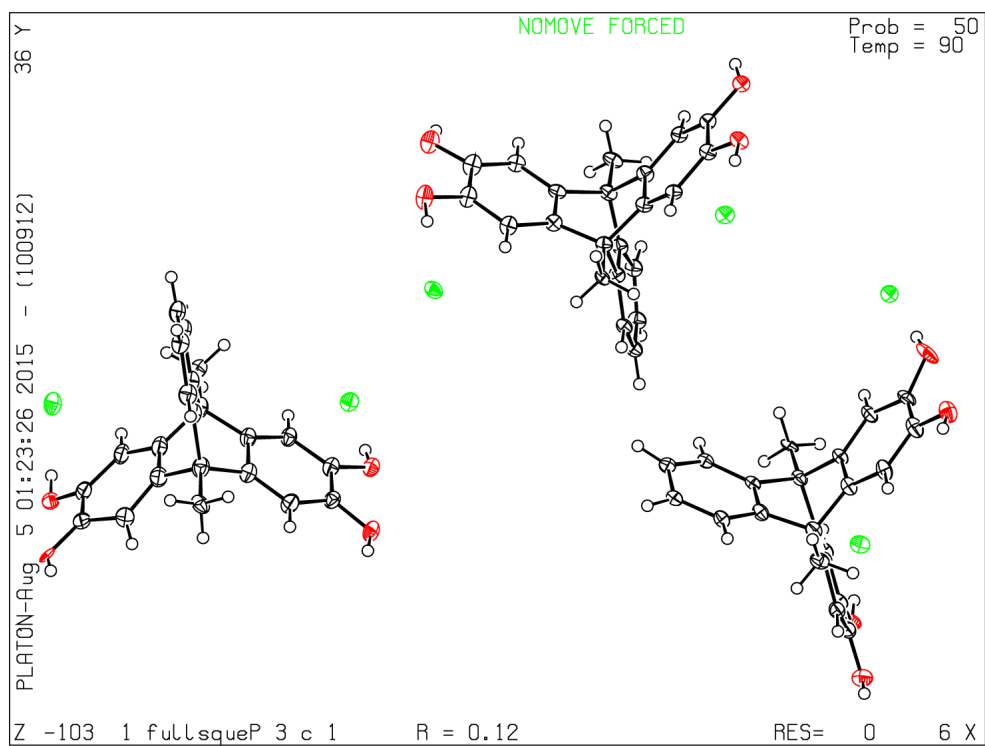

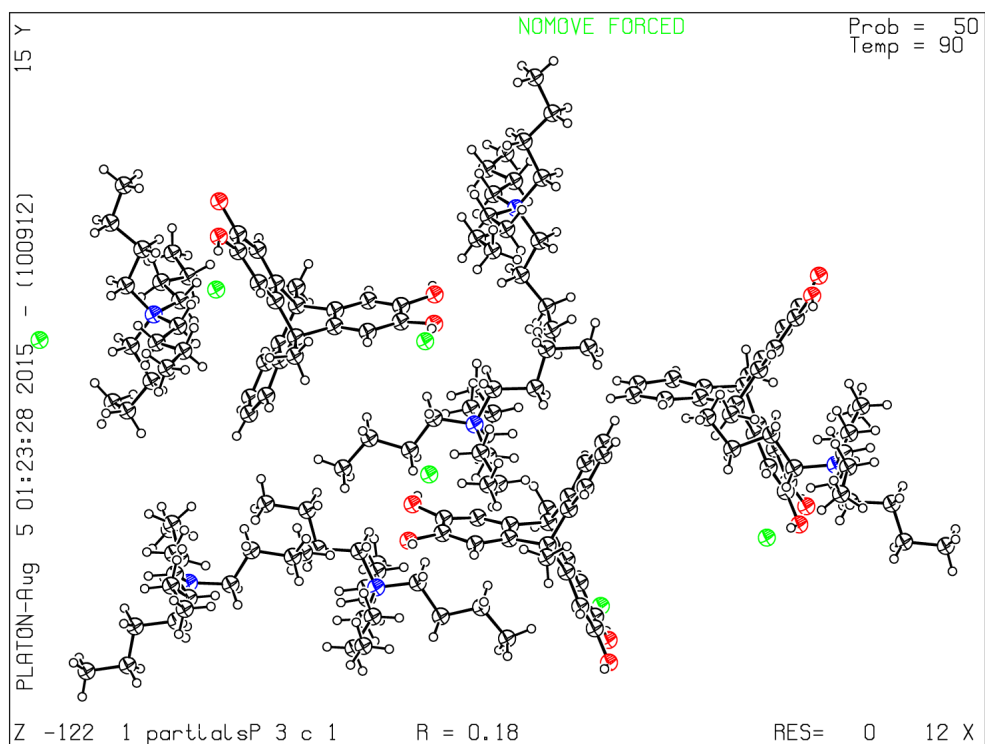

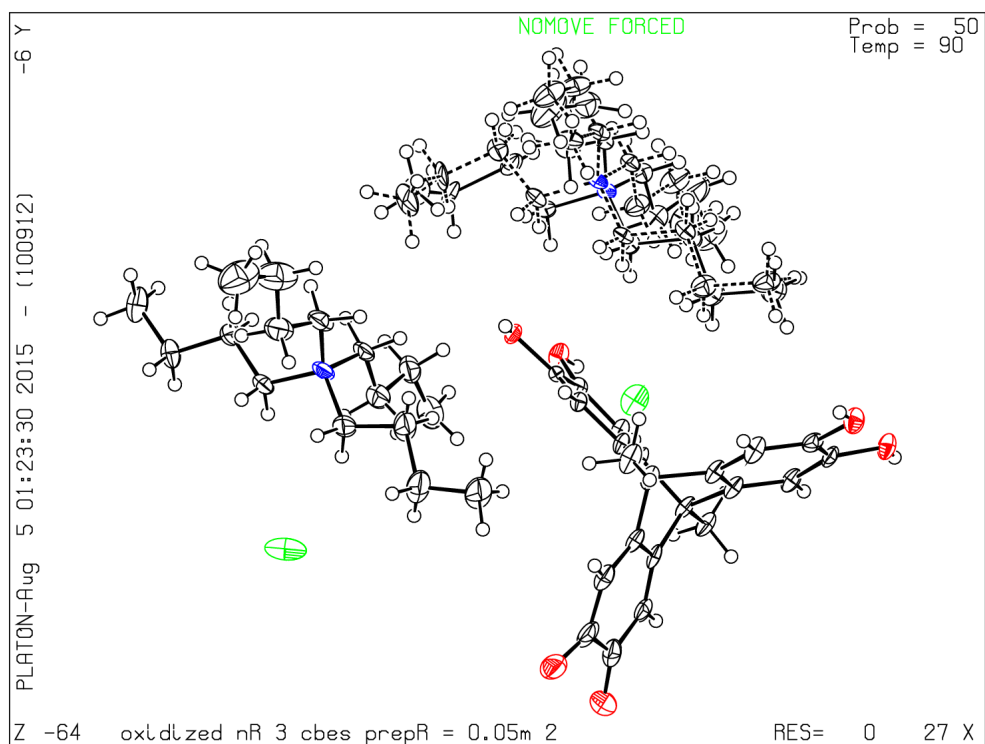

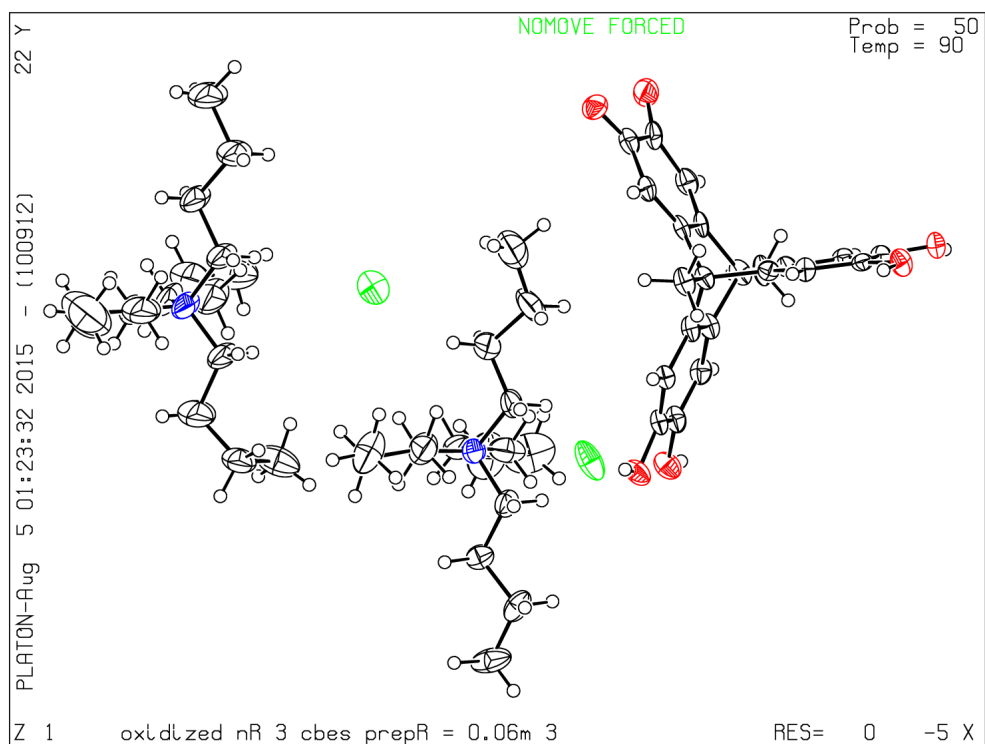

Supplement: c5sc02577j1.zip [file c5sc02577j1.zip]
